# Supplementary material for: Investigation of euthanasia techniques in four species of cockroaches
Source: PeerJ. 2023 Oct 30;11:e16199. doi: 10.7717/peerj.16199 (PMC10621589; doi:10.7717/peerj.16199)
Supplement: Supplemental Information 1 — All of the study groups from this study and assessing the efficacy of the investigated euthanasia methods. [file peerj-11-16199-s001.xlsx]

## Sheet: Dubia Cockroaches
Cockroach ID	Tx Group	Duration Group	Clock Time	Initial Box Temperature (C)	Initial Concentration 5 min (ISO%)	Initial Concentration 5 min (mmHg)	Anesthesia Time (sec)	Anesthesia Clock Time	Anesthesia Conc (ISO %)	Anesthesia Conc (CO2 mmHg)	Conc (ISO%) 30 min post AT	Conc (CO2 mmHg) 30 min post AT	Temp 30 min post AT (C)	Response?	Clock Time For TX	Temperature (C) of TX	Recovery?	Time to 1st Movement	Weight (g)	Sex
	FREEZING																				Notes:
A	-18C	15MIN	14:12:00	24.5	7.84	1	1450	14:36:00	19.72	2	30	4	24.38	NONE	15:12	-16.88	YES	<2HOURS	3.2	F
B	-18C	15MIN	14:12:00	24.5	7.84	1	1450	14:36:00	19.72	2	30	4	24.38	NONE	15:12	-16.88	YES	<2HOURS	1.4	M
C	-18C	15MIN	14:12:00	24.5	7.84	1	1450	14:36:00	19.72	2	30	4	24.38	NONE	15:12	-16.88	YES	<2HOURS	1.1	M
D	-18C	15MIN	14:12:00	24.5	7.84	1	1450	14:36:00	19.72	2	30	4	24.38	NONE	15:12	-16.88	YES	<2HOURS	2.8	F
E	-18C	15MIN	14:12:00	24.5	7.84	1	1450	14:36:00	19.72	2	30	4	24.38	NONE	15:12	-16.88	YES	<2HOURS	2.1	F
F	-18C	15MIN	14:12:00	24.5	7.84	1	1450	14:36:00	19.72	2	30	4	24.38	NONE	15:12	-16.88	NO	N/A	1.6	F
G	-18C	15MIN	14:12:00	24.5	7.84	1	1450	14:36:00	19.72	2	30	4	24.38	NONE	15:12	-16.88	YES	<2HOURS	1.7	M
H	-18C	15MIN	14:12:00	24.5	7.84	1	1450	14:36:00	19.72	2	30	4	24.38	NONE	15:12	-16.88	YES	<2HOURS	3	F
I	-18C	15MIN	14:12:00	24.5	7.84	1	1450	14:36:00	19.72	2	30	4	24.38	NONE	15:12	-16.88	YES	<2HOURS	2.4	F
J	-18C	15MIN	14:12:00	24.5	7.84	1	1450	14:36:00	19.72	2	30	4	24.38	NONE	15:12	-16.88	YES	<2HOURS	2.8	F
A	-80C	15MIN	14:12:00	24.5	7.92	1	1760	14:42:00	20.24	2	30	4	N/A	NONE	15:16	-79	NO	N/A	2.9	F
B	-80C	15MIN	14:12:00	24.5	7.92	1	1760	14:42:00	20.24	2	30	4	N/A	NONE	15:16	-79	NO	N/A	1.4	M
C	-80C	15MIN	14:12:00	24.5	7.92	1	1760	14:42:00	20.24	2	30	4	N/A	NONE	15:16	-79	YES	<2HOURS	2.8	F
D	-80C	15MIN	14:12:00	24.5	7.92	1	1760	14:42:00	20.24	2	30	4	N/A	NONE	15:16	-79	YES	<2HOURS	3	F
E	-80C	15MIN	14:12:00	24.5	7.92	1	1760	14:42:00	20.24	2	30	4	N/A	NONE	15:16	-79	NO	N/A	1.3	M
F	-80C	15MIN	14:12:00	24.5	7.92	1	1760	14:42:00	20.24	2	30	4	N/A	NONE	15:16	-79	NO	N/A	2.5	F
G	-80C	15MIN	14:12:00	24.5	7.92	1	1760	14:42:00	20.24	2	30	4	N/A	NONE	15:16	-79	NO	N/A	1.3	M
H	-80C	15MIN	14:12:00	24.5	7.92	1	1760	14:42:00	20.24	2	30	4	N/A	NONE	15:16	-79	YES	<2HOURS	2.8	F
I	-80C	15MIN	14:12:00	24.5	7.92	1	1760	14:42:00	20.24	2	30	4	N/A	NONE	15:16	-79	NO	N/A	1.4	M
J	-80C	15MIN	14:12:00	24.5	7.92	1	1760	14:42:00	20.24	2	30	4	N/A	NONE	15:16	-79	NO	N/A	1.3	M
A	-18C	30MIN	12:54:00	24.5	7.05	1	2130	13:30:00	21.68	3	30	4	24.27	NONE	14:04	-17.27	YES	<2HOURS	1.1	M
B	-18C	30MIN	12:54:00	24.5	7.05	1	2130	13:30:00	21.68	3	30	4	24.27	NONE	14:04	-17.27	NO	N/A	1.5	M
C	-18C	30MIN	12:54:00	24.5	7.05	1	2130	13:30:00	21.68	3	30	4	24.27	NONE	14:04	-17.27	YES	<2HOURS	2.4	F
D	-18C	30MIN	12:54:00	24.5	7.05	1	2130	13:30:00	21.68	3	30	4	24.27	NONE	14:04	-17.27	YES	<2HOURS	1.3	M
E	-18C	30MIN	12:54:00	24.5	7.05	1	2130	13:30:00	21.68	3	30	4	24.27	NONE	14:04	-17.27	YES	<2HOURS	1.4	M
F	-18C	30MIN	12:54:00	24.5	7.05	1	2130	13:30:00	21.68	3	30	4	24.27	NONE	14:04	-17.27	YES	<2HOURS	2.7	F
G	-18C	30MIN	12:54:00	24.5	7.05	1	2130	13:30:00	21.68	3	30	4	24.27	NONE	14:04	-17.27	YES	<2HOURS	2.4	F
H	-18C	30MIN	12:54:00	24.5	7.05	1	2130	13:30:00	21.68	3	30	4	24.27	NONE	14:04	-17.27	YES	<2HOURS	1.2	M
I	-18C	30MIN	12:54:00	24.5	7.05	1	2130	13:30:00	21.68	3	30	4	24.27	NONE	14:04	-17.27	YES	<2HOURS	1.1	M
J	-18C	30MIN	12:54:00	24.5	7.05	1	2130	13:30:00	21.68	3	30	4	24.27	NONE	14:04	-17.27	YES	<2HOURS	3.2	F
A	-80C	30MIN	12:54:00	24.5	7	2	1675	13:22:00	19.3	2	30	4	24.38	NONE	13:57	-80	NO	N/A	2.8	F
B	-80C	30MIN	12:54:00	24.5	7	2	1675	13:22:00	19.3	2	30	4	24.38	NONE	13:57	-80	NO	N/A	2.6	F
C	-80C	30MIN	12:54:00	24.5	7	2	1675	13:22:00	19.3	2	30	4	24.38	NONE	13:57	-80	NO	N/A	1.4	M
D	-80C	30MIN	12:54:00	24.5	7	2	1675	13:22:00	19.3	2	30	4	24.38	NONE	13:57	-80	NO	N/A	1.5	M
E	-80C	30MIN	12:54:00	24.5	7	2	1675	13:22:00	19.3	2	30	4	24.38	NONE	13:57	-80	NO	N/A	3.1	F
F	-80C	30MIN	12:54:00	24.5	7	2	1675	13:22:00	19.3	2	30	4	24.38	NONE	13:57	-80	NO	N/A	2.3	F
G	-80C	30MIN	12:54:00	24.5	7	2	1675	13:22:00	19.3	2	30	4	24.38	NONE	13:57	-80	NO	N/A	1.3	M
H	-80C	30MIN	12:54:00	24.5	7	2	1675	13:22:00	19.3	2	30	4	24.38	NONE	13:57	-80	NO	N/A	2.3	F
I	-80C	30MIN	12:54:00	24.5	7	2	1675	13:22:00	19.3	2	30	4	24.38	NONE	13:57	-80	NO	N/A	2.3	F
J	-80C	30MIN	12:54:00	24.5	7	2	1675	13:22:00	19.3	2	30	4	24.38	NONE	13:57	-80	NO	N/A	1.6	M
A	-80C	1HR	14:54:00	25.22	9.14	1	1060	15:11:00	16.38	2	30	4	25.22	NONE	15:45	-80	NO	N/A	1.6	M
B	-80C	1HR	14:54:00	25.22	9.14	1	1060	15:11:00	16.38	2	30	4	25.22	NONE	15:45	-80	NO	N/A	2.9	F
C	-80C	1HR	14:54:00	25.22	9.14	1	1060	15:11:00	16.38	2	30	4	25.22	NONE	15:45	-80	NO	N/A	2.7	F
D	-80C	1HR	14:54:00	25.22	9.14	1	1060	15:11:00	16.38	2	30	4	25.22	NONE	15:45	-80	NO	N/A	2.6	F
E	-80C	1HR	14:54:00	25.22	9.14	1	1060	15:11:00	16.38	2	30	4	25.22	NONE	15:45	-80	NO	N/A	1.5	M
F	-80C	1HR	14:54:00	25.22	9.14	1	1060	15:11:00	16.38	2	30	4	25.22	NONE	15:45	-80	NO	N/A	1.8	M
G	-80C	1HR	14:54:00	25.22	9.14	1	1060	15:11:00	16.38	2	30	4	25.22	NONE	15:45	-80	NO	N/A	1.3	M
H	-80C	1HR	14:54:00	25.22	9.14	1	1060	15:11:00	16.38	2	30	4	25.22	NONE	15:45	-80	NO	N/A	2.8	F
I	-80C	1HR	14:54:00	25.22	9.14	1	1060	15:11:00	16.38	2	30	4	25.22	NONE	15:45	-80	NO	N/A	1.2	M
J	-80C	1HR	14:54:00	25.22	9.14	1	1060	15:11:00	16.38	2	30	4	25.22	NONE	15:45	-80	NO	N/A	1.2	M
A	-18C	1HR	14:53:00	25.22	8.64	1	1455	15:18:00	19.84	2	30	4	25.5	NONE	15:51	-14.44	NO	N/A	2.3	F
B	-18C	1HR	14:53:00	25.22	8.64	1	1455	15:18:00	19.84	2	30	4	25.5	NONE	15:51	-14.44	NO	N/A	2.2	F
C	-18C	1HR	14:53:00	25.22	8.64	1	1455	15:18:00	19.84	2	30	4	25.5	NONE	15:51	-14.44	NO	N/A	1.8	F
D	-18C	1HR	14:53:00	25.22	8.64	1	1455	15:18:00	19.84	2	30	4	25.5	NONE	15:51	-14.44	NO	N/A	2.4	F
E	-18C	1HR	14:53:00	25.22	8.64	1	1455	15:18:00	19.84	2	30	4	25.5	NONE	15:51	-14.44	NO	N/A	2.6	F
F	-18C	1HR	14:53:00	25.22	8.64	1	1455	15:18:00	19.84	2	30	4	25.5	NONE	15:51	-14.44	NO	N/A	2	F
G	-18C	1HR	14:53:00	25.22	8.64	1	1455	15:18:00	19.84	2	30	4	25.5	NONE	15:51	-14.44	NO	N/A	1.8	M
H	-18C	1HR	14:53:00	25.22	8.64	1	1455	15:18:00	19.84	2	30	4	25.5	NONE	15:51	-14.44	NO	N/A	1.4	M
I	-18C	1HR	14:53:00	25.22	8.64	1	1455	15:18:00	19.84	2	30	4	25.5	NONE	15:51	-14.44	NO	N/A	1.3	M
J	-18C	1HR	14:53:00	25.22	8.64	1	1455	15:18:00	19.84	2	30	4	25.5	NONE	15:51	-14.44	NO	N/A	1.3	M
A	-18C	2HR	11:46:00	24.72	8.19	0	1586	12:13:00	21.19	2	30	5	25.22	NONE	12:46	-13.88	NO	N/A	1.5	M
B	-18C	2HR	11:46:00	24.72	8.19	0	1586	12:13:00	21.19	2	30	5	25.22	NONE	12:46	-13.88	NO	N/A	1.6	M
C	-18C	2HR	11:46:00	24.72	8.19	0	1586	12:13:00	21.19	2	30	5	25.22	NONE	12:46	-13.88	NO	N/A	2.7	F
D	-18C	2HR	11:46:00	24.72	8.19	0	1586	12:13:00	21.19	2	30	5	25.22	NONE	12:46	-13.88	NO	N/A	2.2	F
E	-18C	2HR	11:46:00	24.72	8.19	0	1586	12:13:00	21.19	2	30	5	25.22	NONE	12:46	-13.88	NO	N/A	2.3	F
F	-18C	2HR	11:46:00	24.72	8.19	0	1586	12:13:00	21.19	2	30	5	25.22	NONE	12:46	-13.88	NO	N/A	3.1	F
G	-18C	2HR	11:46:00	24.72	8.19	0	1586	12:13:00	21.19	2	30	5	25.22	NONE	12:46	-13.88	NO	N/A	1.5	M
H	-18C	2HR	11:46:00	24.72	8.19	0	1586	12:13:00	21.19	2	30	5	25.22	NONE	12:46	-13.88	NO	N/A	1.7	M
I	-18C	2HR	11:46:00	24.72	8.19	0	1586	12:13:00	21.19	2	30	5	25.22	NONE	12:46	-13.88	NO	N/A	1.7	M
J	-18C	2HR	11:46:00	24.72	8.19	0	1586	12:13:00	21.19	2	30	5	25.22	NONE	12:46	-13.88	NO	N/A	2.4	F
A	-80C	2HR	11:46:00	24.72	10.3	0	892	12:00:00	17.6	0	30	0	25.11	NONE	12:36	-80	NO	N/A	1.5	M
B	-80C	2HR	11:46:00	24.72	10.3	0	892	12:00:00	17.6	0	30	0	25.11	NONE	12:36	-80	NO	N/A	1.2	M
C	-80C	2HR	11:46:00	24.72	10.3	0	892	12:00:00	17.6	0	30	0	25.11	NONE	12:36	-80	NO	N/A	2.8	F
D	-80C	2HR	11:46:00	24.72	10.3	0	892	12:00:00	17.6	0	30	0	25.11	NONE	12:36	-80	NO	N/A	1.6	M
E	-80C	2HR	11:46:00	24.72	10.3	0	892	12:00:00	17.6	0	30	0	25.11	NONE	12:36	-80	NO	N/A	3	F
F	-80C	2HR	11:46:00	24.72	10.3	0	892	12:00:00	17.6	0	30	0	25.11	NONE	12:36	-80	NO	N/A	2.1	F
G	-80C	2HR	11:46:00	24.72	10.3	0	892	12:00:00	17.6	0	30	0	25.11	NONE	12:36	-80	NO	N/A	2.7	F
H	-80C	2HR	11:46:00	24.72	10.3	0	892	12:00:00	17.6	0	30	0	25.11	NONE	12:36	-80	NO	N/A	2	F
I	-80C	2HR	11:46:00	24.72	10.3	0	892	12:00:00	17.6	0	30	0	25.11	NONE	12:36	-80	NO	N/A	2.9	F
J	-80C	2HR	11:46:00	24.72	10.3	0	892	12:00:00	17.6	0	30	0	25.11	NONE	12:36	-80	NO	N/A	2.7	F
A	-18C	4HR	10:36	24.22	8.19	N/A	767	10:49	14.58	1	N/A	N/A	24.5	NONE	11:27	-13.88	NO	N/A	1.4	M
B	-18C	4HR	10:36	24.22	8.19	N/A	767	10:49	14.58	1	N/A	N/A	24.5	NONE	11:27	-13.88	NO	N/A	2.5	F
C	-18C	4HR	10:36	24.22	8.19	N/A	767	10:49	14.58	1	N/A	N/A	24.5	NONE	11:27	-13.88	NO	N/A	2.2	F
D	-18C	4HR	10:36	24.22	8.19	N/A	767	10:49	14.58	1	N/A	N/A	24.5	NONE	11:27	-13.88	NO	N/A	1.8	M
E	-18C	4HR	10:36	24.22	8.19	N/A	767	10:49	14.58	1	N/A	N/A	24.5	NONE	11:27	-13.88	NO	N/A	2.5	F
F	-18C	4HR	10:36	24.22	8.19	N/A	767	10:49	14.58	1	N/A	N/A	24.5	NONE	11:27	-13.88	NO	N/A	2.8	F
G	-18C	4HR	10:36	24.22	8.19	N/A	767	10:49	14.58	1	N/A	N/A	24.5	NONE	11:27	-13.88	NO	N/A	2.8	F
H	-18C	4HR	10:36	24.22	8.19	N/A	767	10:49	14.58	1	N/A	N/A	24.5	NONE	11:27	-13.88	NO	N/A	2.9	F
I	-18C	4HR	10:36	24.22	8.19	N/A	767	10:49	14.58	1	N/A	N/A	24.5	NONE	11:27	-13.88	NO	N/A	3	F
J	-18C	4HR	10:36	24.22	8.19	N/A	767	10:49	14.58	1	N/A	N/A	24.5	NONE	11:27	-13.88	NO	N/A	2.1	F
A	-80C	4HR	11:00	24.22	8.61	1	2140	11:36:00	30	4	30	5	N/A	NONE	12:11	-80	NO	N/A	1.6	M
B	-80C	4HR	11:00	24.22	8.61	1	2140	11:36:00	30	4	30	5	N/A	NONE	12:11	-80	NO	N/A	3.2	F
C	-80C	4HR	11:00	24.22	8.61	1	2140	11:36:00	30	4	30	5	N/A	NONE	12:11	-80	NO	N/A	3.6	F
D	-80C	4HR	11:00	24.22	8.61	1	2140	11:36:00	30	4	30	5	N/A	NONE	12:11	-80	NO	N/A	3.1	F
E	-80C	4HR	11:00	24.22	8.61	1	2140	11:36:00	30	4	30	5	N/A	NONE	12:11	-80	NO	N/A	2.7	F
F	-80C	4HR	11:00	24.22	8.61	1	2140	11:36:00	30	4	30	5	N/A	NONE	12:11	-80	NO	N/A	1.8	M
G	-80C	4HR	11:00	24.22	8.61	1	2140	11:36:00	30	4	30	5	N/A	NONE	12:11	-80	NO	N/A	3	F
H	-80C	4HR	11:00	24.22	8.61	1	2140	11:36:00	30	4	30	5	N/A	NONE	12:11	-80	NO	N/A	2.8	F
I	-80C	4HR	11:00	24.22	8.61	1	2140	11:36:00	30	4	30	5	N/A	NONE	12:11	-80	NO	N/A	1.6	M
J	-80C	4HR	11:00	24.22	8.61	1	2140	11:36:00	30	4	30	5	N/A	NONE	12:11	-80	NO	N/A	2.9	F
A	-18C	8HR	10:37:00	24.22	7.95	N/A	1050	10:55:00	17.1	2	N/A	N/A	24.61	NONE	11:27	-13.88	NO	N/A	2.5	F
B	-18C	8HR	10:37:00	24.22	7.95	N/A	1050	10:55:00	17.1	2	N/A	N/A	24.61	NONE	11:27	-13.88	NO	N/A	3	F
C	-18C	8HR	10:37:00	24.22	7.95	N/A	1050	10:55:00	17.1	2	N/A	N/A	24.61	NONE	11:27	-13.88	NO	N/A	2.9	F
D	-18C	8HR	10:37:00	24.22	7.95	N/A	1050	10:55:00	17.1	2	N/A	N/A	24.61	NONE	11:27	-13.88	NO	N/A	1.7	M
E	-18C	8HR	10:37:00	24.22	7.95	N/A	1050	10:55:00	17.1	2	N/A	N/A	24.61	NONE	11:27	-13.88	NO	N/A	1.4	M
F	-18C	8HR	10:37:00	24.22	7.95	N/A	1050	10:55:00	17.1	2	N/A	N/A	24.61	NONE	11:27	-13.88	NO	N/A	2.7	F
G	-18C	8HR	10:37:00	24.22	7.95	N/A	1050	10:55:00	17.1	2	N/A	N/A	24.61	NONE	11:27	-13.88	NO	N/A	2.3	F
H	-18C	8HR	10:37:00	24.22	7.95	N/A	1050	10:55:00	17.1	2	N/A	N/A	24.61	NONE	11:27	-13.88	NO	N/A	1.6	M
I	-18C	8HR	10:37:00	24.22	7.95	N/A	1050	10:55:00	17.1	2	N/A	N/A	24.61	NONE	11:27	-13.88	NO	N/A	2.3	F
J	-18C	8HR	10:37:00	24.22	7.95	N/A	1050	10:55:00	17.1	2	N/A	N/A	24.61	NONE	11:27	-13.88	NO	N/A	1.2	M
A	-80C	8HR	11:02:00	24.22	8	N/A	1620	11:29:00	20.27	3	30	5	25.11	NONE	12:04	-80	NO	N/A	1.9	M
B	-80C	8HR	11:02:00	24.22	8	N/A	1620	11:29:00	20.27	3	30	5	25.11	NONE	12:04	-80	NO	N/A	2.1	F
C	-80C	8HR	11:02:00	24.22	8	N/A	1620	11:29:00	20.27	3	30	5	25.11	NONE	12:04	-80	NO	N/A	2.4	F
D	-80C	8HR	11:02:00	24.22	8	N/A	1620	11:29:00	20.27	3	30	5	25.11	NONE	12:04	-80	NO	N/A	1.6	M
E	-80C	8HR	11:02:00	24.22	8	N/A	1620	11:29:00	20.27	3	30	5	25.11	NONE	12:04	-80	NO	N/A	2.7	F
F	-80C	8HR	11:02:00	24.22	8	N/A	1620	11:29:00	20.27	3	30	5	25.11	NONE	12:04	-80	NO	N/A	3	F
G	-80C	8HR	11:02:00	24.22	8	N/A	1620	11:29:00	20.27	3	30	5	25.11	NONE	12:04	-80	NO	N/A	1.5	M
H	-80C	8HR	11:02:00	24.22	8	N/A	1620	11:29:00	20.27	3	30	5	25.11	NONE	12:04	-80	NO	N/A	2.8	F
I	-80C	8HR	11:02:00	24.22	8	N/A	1620	11:29:00	20.27	3	30	5	25.11	NONE	12:04	-80	NO	N/A	2.1	F
J	-80C	8HR	11:02:00	24.22	8	N/A	1620	11:29:00	20.27	3	30	5	25.11	NONE	12:04	-80	NO	N/A	2.7	F
A	-18C	16HR	16:04:00	25.72	8.84	1	1276	16:25:00	17.52	8	23.83	2	24.38	NONE	17:02	-12.11	NO	N/A	3.2	F
B	-18C	16HR	16:04:00	25.72	8.84	1	1276	16:25:00	17.52	8	23.83	2	24.38	NONE	17:02	-12.11	NO	N/A	1.4	M
C	-18C	16HR	16:04:00	25.72	8.84	1	1276	16:25:00	17.52	8	23.83	2	24.38	NONE	17:02	-12.11	NO	N/A	1.5	M
D	-18C	16HR	16:04:00	25.72	8.84	1	1276	16:25:00	17.52	8	23.83	2	24.38	NONE	17:02	-12.11	NO	N/A	1.4	M
E	-18C	16HR	16:04:00	25.72	8.84	1	1276	16:25:00	17.52	8	23.83	2	24.38	NONE	17:02	-12.11	NO	N/A	1.4	M
F	-18C	16HR	16:04:00	25.72	8.84	1	1276	16:25:00	17.52	8	23.83	2	24.38	NONE	17:02	-12.11	NO	N/A	2.4	F
G	-18C	16HR	16:04:00	25.72	8.84	1	1276	16:25:00	17.52	8	23.83	2	24.38	NONE	17:02	-12.11	NO	N/A	2.2	F
H	-18C	16HR	16:04:00	25.72	8.84	1	1276	16:25:00	17.52	8	23.83	2	24.38	NONE	17:02	-12.11	NO	N/A	2.4	F
I	-18C	16HR	16:04:00	25.72	8.84	1	1276	16:25:00	17.52	8	23.83	2	24.38	NONE	17:02	-12.11	NO	N/A	1.5	M
J	-18C	16HR	16:04:00	25.72	8.84	1	1276	16:25:00	17.52	8	23.83	2	24.38	NONE	17:02	-12.11	NO	N/A	1.3	M
A	-80C	16HR	16:04:00	25.72	8.49	1	1209	16:23:00	19.7	2	30	3	24.88	NONE	16:56	-79	NO	N/A	1.6	M
B	-80C	16HR	16:04:00	25.72	8.49	1	1209	16:23:00	19.7	2	30	3	24.88	NONE	16:56	-79	NO	N/A	2.8	F
C	-80C	16HR	16:04:00	25.72	8.49	1	1209	16:23:00	19.7	2	30	3	24.88	NONE	16:56	-79	NO	N/A	2.9	F
D	-80C	16HR	16:04:00	25.72	8.49	1	1209	16:23:00	19.7	2	30	3	24.88	NONE	16:56	-79	NO	N/A	2.9	F
E	-80C	16HR	16:04:00	25.72	8.49	1	1209	16:23:00	19.7	2	30	3	24.88	NONE	16:56	-79	NO	N/A	2.9	F
F	-80C	16HR	16:04:00	25.72	8.49	1	1209	16:23:00	19.7	2	30	3	24.88	NONE	16:56	-79	NO	N/A	1.5	M
G	-80C	16HR	16:04:00	25.72	8.49	1	1209	16:23:00	19.7	2	30	3	24.88	NONE	16:56	-79	NO	N/A	2	F
H	-80C	16HR	16:04:00	25.72	8.49	1	1209	16:23:00	19.7	2	30	3	24.88	NONE	16:56	-79	NO	N/A	2.2	F
I	-80C	16HR	16:04:00	25.72	8.49	1	1209	16:23:00	19.7	2	30	3	24.88	NONE	16:56	-79	NO	N/A	1.5	M
J	-80C	16HR	16:04:00	25.72	8.49	1	1209	16:23:00	19.7	2	30	3	24.88	NONE	16:56	-79	NO	N/A	1.9	F
A	-18C	24HR	15:03:00	25.5	7.28	1	1425	15:27:00	18.14	2	30	4	25.61	NONE	16:01	-13.78	NO	N/A	1.3	M
B	-18C	24HR	15:03:00	25.5	7.28	1	1425	15:27:00	18.14	2	30	4	25.61	NONE	16:01	-13.78	NO	N/A	2.6	F
C	-18C	24HR	15:03:00	25.5	7.28	1	1425	15:27:00	18.14	2	30	4	25.61	NONE	16:01	-13.78	NO	N/A	2.6	F
D	-18C	24HR	15:03:00	25.5	7.28	1	1425	15:27:00	18.14	2	30	4	25.61	NONE	16:01	-13.78	NO	N/A	1.5	M
E	-18C	24HR	15:03:00	25.5	7.28	1	1425	15:27:00	18.14	2	30	4	25.61	NONE	16:01	-13.78	NO	N/A	1.5	M
F	-18C	24HR	15:03:00	25.5	7.28	1	1425	15:27:00	18.14	2	30	4	25.61	NONE	16:01	-13.78	NO	N/A	1.5	M
G	-18C	24HR	15:03:00	25.5	7.28	1	1425	15:27:00	18.14	2	30	4	25.61	NONE	16:01	-13.78	NO	N/A	2.3	F
H	-18C	24HR	15:03:00	25.5	7.28	1	1425	15:27:00	18.14	2	30	4	25.61	NONE	16:01	-13.78	NO	N/A	2.6	F
I	-18C	24HR	15:03:00	25.5	7.28	1	1425	15:27:00	18.14	2	30	4	25.61	NONE	16:01	-13.78	NO	N/A	2.5	F
J	-18C	24HR	15:03:00	25.5	7.28	1	1425	15:27:00	18.14	2	30	4	25.61	NONE	16:01	-13.78	NO	N/A	2.1	F
A	-80C	24HR	15:02:00	25.5	8.97	1	1215	15:22:00	18.6	3	30	4	25.5	NONE	15:56	-79	NO	N/A	2.7	F
B	-80C	24HR	15:02:00	25.5	8.97	1	1215	15:22:00	18.6	3	30	4	25.5	NONE	15:56	-79	NO	N/A	3	F
C	-80C	24HR	15:02:00	25.5	8.97	1	1215	15:22:00	18.6	3	30	4	25.5	NONE	15:56	-79	NO	N/A	1.3	M
D	-80C	24HR	15:02:00	25.5	8.97	1	1215	15:22:00	18.6	3	30	4	25.5	NONE	15:56	-79	NO	N/A	2.2	F
E	-80C	24HR	15:02:00	25.5	8.97	1	1215	15:22:00	18.6	3	30	4	25.5	NONE	15:56	-79	NO	N/A	2.6	F
F	-80C	24HR	15:02:00	25.5	8.97	1	1215	15:22:00	18.6	3	30	4	25.5	NONE	15:56	-79	NO	N/A	1.2	M
G	-80C	24HR	15:02:00	25.5	8.97	1	1215	15:22:00	18.6	3	30	4	25.5	NONE	15:56	-79	NO	N/A	1.4	M
H	-80C	24HR	15:02:00	25.5	8.97	1	1215	15:22:00	18.6	3	30	4	25.5	NONE	15:56	-79	NO	N/A	1.4	M
I	-80C	24HR	15:02:00	25.5	8.97	1	1215	15:22:00	18.6	3	30	4	25.5	NONE	15:56	-79	NO	N/A	2.5	F
J	-80C	24HR	15:02:00	25.5	8.97	1	1215	15:22:00	18.6	3	30	4	25.5	NONE	15:56	-79	NO	N/A	2.4	F
	IMMERSION																NOT MATCHED		NOT MATCHED	NOT MATCHED	Notes:
	WATER	15MIN	10:02:00	23.88	6.85	1	1960	10:38:00	19.27	3	30	4	25	NONE	11:08		YES	<4HOURS	1.9	M	None of the weights, sexes will match since we could not weigh them prior to immersion
	WATER	15MIN	10:02:00	23.88	6.85	1	1960	10:38:00	19.27	3	30	4	25	NONE	11:08		YES	<4HOURS	1.6	M
	WATER	15MIN	10:02:00	23.88	6.85	1	1960	10:38:00	19.27	3	30	4	25	NONE	11:08		YES	<4HOURS	1.4	M
	WATER	15MIN	10:02:00	23.88	6.85	1	1960	10:38:00	19.27	3	30	4	25	NONE	11:08		YES	<4HOURS	1.1	M
	WATER	15MIN	10:02:00	23.88	6.85	1	1960	10:38:00	19.27	3	30	4	25	NONE	11:08		YES	<4HOURS	1.4	M
	WATER	15MIN	10:02:00	23.88	6.85	1	1960	10:38:00	19.27	3	30	4	25	NONE	11:08		YES	<4HOURS	1.5	F
	WATER	15MIN	10:02:00	23.88	6.85	1	1960	10:38:00	19.27	3	30	4	25	NONE	11:08		YES	<4HOURS	2.2	F
	WATER	15MIN	10:02:00	23.88	6.85	1	1960	10:38:00	19.27	3	30	4	25	NONE	11:08		YES	<4HOURS	1.3	F
	WATER	15MIN	10:02:00	23.88	6.85	1	1960	10:38:00	19.27	3	30	4	25	NONE	11:08		NO	N/A	2.3	F
	WATER	15MIN	10:02:00	23.88	6.85	1	1960	10:38:00	19.27	3	30	4	25	NONE	11:08		NO	N/A	3	F
	WATER	30MIN	10:28:00	24.5	11.11	1	1985	11:01:00	30	2	30	4	24.72	NONE	11:34		YES	<2HOURS	2.6	M
	WATER	30MIN	10:28:00	24.5	11.11	1	1985	11:01:00	30	2	30	4	24.72	NONE	11:34		YES	<2HOURS	1.3	M
	WATER	30MIN	10:28:00	24.5	11.11	1	1985	11:01:00	30	2	30	4	24.72	NONE	11:34		YES	<2HOURS	1.6	M
	WATER	30MIN	10:28:00	24.5	11.11	1	1985	11:01:00	30	2	30	4	24.72	NONE	11:34		YES	<2HOURS	3.1	M
	WATER	30MIN	10:28:00	24.5	11.11	1	1985	11:01:00	30	2	30	4	24.72	NONE	11:34		YES	<2HOURS	1.7	F
	WATER	30MIN	10:28:00	24.5	11.11	1	1985	11:01:00	30	2	30	4	24.72	NONE	11:34		YES	<2HOURS	2.5	F
	WATER	30MIN	10:28:00	24.5	11.11	1	1985	11:01:00	30	2	30	4	24.72	NONE	11:34		YES	<2HOURS	1.6	F
	WATER	30MIN	10:28:00	24.5	11.11	1	1985	11:01:00	30	2	30	4	24.72	NONE	11:34		YES	<2HOURS	1.6	F
	WATER	30MIN	10:28:00	24.5	11.11	1	1985	11:01:00	30	2	30	4	24.72	NONE	11:34		YES	<2HOURS	2.7	F
	WATER	30MIN	10:28:00	24.5	11.11	1	1985	11:01:00	30	2	30	4	24.72	NONE	11:34		NO	N/A	2.1	F
	FORMALIN	15MIN	10:03:00	23.88	6.95	1	1760	10:32:00	19.81	2	30	4	25	NONE	11:06		YES	<3HOURS	3	M
	FORMALIN	15MIN	10:03:00	23.88	6.95	1	1760	10:32:00	19.81	2	30	4	25	NONE	11:06		YES	<3HOURS	2.2	M
	FORMALIN	15MIN	10:03:00	23.88	6.95	1	1760	10:32:00	19.81	2	30	4	25	NONE	11:06		YES	<3HOURS	1.2	M
	FORMALIN	15MIN	10:03:00	23.88	6.95	1	1760	10:32:00	19.81	2	30	4	25	NONE	11:06		YES	<3HOURS	2.6	M
	FORMALIN	15MIN	10:03:00	23.88	6.95	1	1760	10:32:00	19.81	2	30	4	25	NONE	11:06		YES	<3HOURS	1.3	F
	FORMALIN	15MIN	10:03:00	23.88	6.95	1	1760	10:32:00	19.81	2	30	4	25	NONE	11:06		YES	<3HOURS	2.2	F
	FORMALIN	15MIN	10:03:00	23.88	6.95	1	1760	10:32:00	19.81	2	30	4	25	NONE	11:06		YES	<3HOURS	2.6	F
	FORMALIN	15MIN	10:03:00	23.88	6.95	1	1760	10:32:00	19.81	2	30	4	25	NONE	11:06		YES	<3HOURS	1.4	F
	FORMALIN	15MIN	10:03:00	23.88	6.95	1	1760	10:32:00	19.81	2	30	4	25	NONE	11:06		YES	<3HOURS	1.4	F
	FORMALIN	15MIN	10:03:00	23.88	6.95	1	1760	10:32:00	19.81	2	30	4	25	NONE	11:06		YES	<3HOURS	3.3	F
	FORMALIN	30MIN	10:58:00	24.77	7.23	0	2123	11:33:00	21.8	3	30	4	24.77	NONE	12:07		YES	<2HOURS	1.5	M
	FORMALIN	30MIN	10:58:00	24.77	7.23	0	2123	11:33:00	21.8	3	30	4	24.77	NONE	12:07		YES	<2HOURS	2.4	M
	FORMALIN	30MIN	10:58:00	24.77	7.23	0	2123	11:33:00	21.8	3	30	4	24.77	NONE	12:07		YES	<2HOURS	1.4	M
	FORMALIN	30MIN	10:58:00	24.77	7.23	0	2123	11:33:00	21.8	3	30	4	24.77	NONE	12:07		YES	<2HOURS	1.6	F
	FORMALIN	30MIN	10:58:00	24.77	7.23	0	2123	11:33:00	21.8	3	30	4	24.77	NONE	12:07		YES	<2HOURS	2.6	F
	FORMALIN	30MIN	10:58:00	24.77	7.23	0	2123	11:33:00	21.8	3	30	4	24.77	NONE	12:07		YES	<2HOURS	2.8	F
	FORMALIN	30MIN	10:58:00	24.77	7.23	0	2123	11:33:00	21.8	3	30	4	24.77	NONE	12:07		NO	N/A	2.9	F
	FORMALIN	30MIN	10:58:00	24.77	7.23	0	2123	11:33:00	21.8	3	30	4	24.77	NONE	12:07		NO	N/A	2	F
	FORMALIN	30MIN	10:58:00	24.77	7.23	0	2123	11:33:00	21.8	3	30	4	24.77	NONE	12:07		NO	N/A	2.6	F
	FORMALIN	30MIN	10:58:00	24.77	7.23	0	2123	11:33:00	21.8	3	30	4	24.77	NONE	12:07		NO	N/A	3.3	F
	ALCOHOL	15MIN	10:04:00	23.88	6.44	1	921	10:19:00	12.77	2	30	4	24.5	1 PUSHED OUT OOTHECA	10:52		NO	N/A	2.1	M
	ALCOHOL	15MIN	10:04:00	23.88	6.44	1	921	10:19:00	12.77	2	30	4	24.5	2 PUSHED OUT OOTHECA	10:52		NO	N/A	1.6	M
	ALCOHOL	15MIN	10:04:00	23.88	6.44	1	921	10:19:00	12.77	2	30	4	24.5	3 PUSHED OUT OOTHECA	10:52		NO	N/A	1.7	M
	ALCOHOL	15MIN	10:04:00	23.88	6.44	1	921	10:19:00	12.77	2	30	4	24.5	4 PUSHED OUT OOTHECA	10:52		NO	N/A	1.4	F
	ALCOHOL	15MIN	10:04:00	23.88	6.44	1	921	10:19:00	12.77	2	30	4	24.5	5 PUSHED OUT OOTHECA	10:52		NO	N/A	2.5	F
	ALCOHOL	15MIN	10:04:00	23.88	6.44	1	921	10:19:00	12.77	2	30	4	24.5	6 PUSHED OUT OOTHECA	10:52		NO	N/A	2.3	F
	ALCOHOL	15MIN	10:04:00	23.88	6.44	1	921	10:19:00	12.77	2	30	4	24.5	7 PUSHED OUT OOTHECA	10:52		NO	N/A	3	F
	ALCOHOL	15MIN	10:04:00	23.88	6.44	1	921	10:19:00	12.77	2	30	4	24.5	8 PUSHED OUT OOTHECA	10:52		NO	N/A	2.7	F
	ALCOHOL	15MIN	10:04:00	23.88	6.44	1	921	10:19:00	12.77	2	30	4	24.5	9 PUSHED OUT OOTHECA	10:52		NO	N/A	2.4	F
	ALCOHOL	15MIN	10:04:00	23.88	6.44	1	921	10:19:00	12.77	2	30	4	24.5	10 PUSHED OUT OOTHECA	10:52		NO	N/A	2.9	F
	ALCOHOL	30MIN	11:14:00	24.88	7.45	1	1645	11:41:00	20.65	2	30	4	24.61	NONE	12:14		NO	N/A	2.4	M
	ALCOHOL	30MIN	11:14:00	24.88	7.45	1	1645	11:41:00	20.65	2	30	4	24.61	NONE	12:14		NO	N/A	2.7	M
	ALCOHOL	30MIN	11:14:00	24.88	7.45	1	1645	11:41:00	20.65	2	30	4	24.61	NONE	12:14		NO	N/A	2.4	M
	ALCOHOL	30MIN	11:14:00	24.88	7.45	1	1645	11:41:00	20.65	2	30	4	24.61	NONE	12:14		NO	N/A	1.8	F
	ALCOHOL	30MIN	11:14:00	24.88	7.45	1	1645	11:41:00	20.65	2	30	4	24.61	NONE	12:14		NO	N/A	1.8	F
	ALCOHOL	30MIN	11:14:00	24.88	7.45	1	1645	11:41:00	20.65	2	30	4	24.61	NONE	12:14		NO	N/A	1.8	F
	ALCOHOL	30MIN	11:14:00	24.88	7.45	1	1645	11:41:00	20.65	2	30	4	24.61	NONE	12:14		NO	N/A	3.4	F
	ALCOHOL	30MIN	11:14:00	24.88	7.45	1	1645	11:41:00	20.65	2	30	4	24.61	NONE	12:14		NO	N/A	3.2	F
	ALCOHOL	30MIN	11:14:00	24.88	7.45	1	1645	11:41:00	20.65	2	30	4	24.61	NONE	12:14		NO	N/A	2.7	F
	ALCOHOL	30MIN	11:14:00	24.88	7.45	1	1645	11:41:00	20.65	2	30	4	24.61	NONE	12:14		NO	N/A	2.4	F
	INJECTABLE																				Notes:
A	KCL		12:43:00	24.5	7.61	0	1470	13:07:00	20.63	2	30	4	24.61	NONE	13:37-13:42		UNK YES	<3HOURS	1.8	M	1 UNK male recovered but not sure which one		0.18
B	KCL		12:43:00	24.5	7.61	0	1470	13:07:00	20.63	2	30	4	24.61	NONE	13:37-13:42		NO	N/A	2.6	F			0.26
C	KCL		12:43:00	24.5	7.61	0	1470	13:07:00	20.63	2	30	4	24.61	NONE	13:37-13:42		NO	N/A	1.5	M			0.15
D	KCL		12:43:00	24.5	7.61	0	1470	13:07:00	20.63	2	30	4	24.61	NONE	13:37-13:42		NO	N/A	1.4	M			0.14
E	KCL		12:43:00	24.5	7.61	0	1470	13:07:00	20.63	2	30	4	24.61	NONE	13:37-13:42		NO	N/A	2.5	F			0.25
F	KCL		12:43:00	24.5	7.61	0	1470	13:07:00	20.63	2	30	4	24.61	NONE	13:37-13:42		NO	N/A	1.4	M			0.14
G	KCL		12:43:00	24.5	7.61	0	1470	13:07:00	20.63	2	30	4	24.61	NONE	13:37-13:42		NO	N/A	2.6	F			0.26
H	KCL		12:43:00	24.5	7.61	0	1470	13:07:00	20.63	2	30	4	24.61	NONE	13:37-13:42		NO	N/A	2.2	F			0.22
I	KCL		12:43:00	24.5	7.61	0	1470	13:07:00	20.63	2	30	4	24.61	NONE	13:37-13:42		NO	N/A	1.5	M			0.14
J	KCL		12:43:00	24.5	7.61	0	1470	13:07:00	20.63	2	30	4	24.61	NONE	13:37-13:42		NO	N/A	1.2	M			0.12
A	PENTOBARBITAL		12:43:00	24.5	8.14	0	1710	13:12:00	19.68	2	30	4	24.61	NONE	13:47-13:49		YES	1HOUR	1.6	M
B	PENTOBARBITAL		12:43:00	24.5	8.14	0	1710	13:12:00	19.68	2	30	4	24.61	NONE	13:47-13:49		NO	N/A	2.9	F
C	PENTOBARBITAL		12:43:00	24.5	8.14	0	1710	13:12:00	19.68	2	30	4	24.61	NONE	13:47-13:49		NO	N/A	1.6	M
D	PENTOBARBITAL		12:43:00	24.5	8.14	0	1710	13:12:00	19.68	2	30	4	24.61	NONE	13:47-13:49		NO	N/A	3	F
E	PENTOBARBITAL		12:43:00	24.5	8.14	0	1710	13:12:00	19.68	2	30	4	24.61	NONE	13:47-13:49		NO	N/A	1.4	M
F	PENTOBARBITAL		12:43:00	24.5	8.14	0	1710	13:12:00	19.68	2	30	4	24.61	NONE	13:47-13:49		NO	N/A	1.6	F
G	PENTOBARBITAL		12:43:00	24.5	8.14	0	1710	13:12:00	19.68	2	30	4	24.61	NONE	13:47-13:49		NO	N/A	2.5	F
H	PENTOBARBITAL		12:43:00	24.5	8.14	0	1710	13:12:00	19.68	2	30	4	24.61	NONE	13:47-13:49		NO	N/A	2.9	F
I	PENTOBARBITAL		12:43:00	24.5	8.14	0	1710	13:12:00	19.68	2	30	4	24.61	NONE	13:47-13:49		NO	N/A	1.5	M
J	PENTOBARBITAL		12:43:00	24.5	8.14	0	1710	13:12:00	19.68	2	30	4	24.61	NONE	13:47-13:49		NO	N/A	2.2	F
	CONTROL										Conc (ISO%) 40 min post AT	Conc (mmHg) 40 min post AT	Temp 40 min post AT								Notes:
A	ISOFLURANE		14:43:00	24.38	N/A	N/A	1792	15:13:00	22.54	2	30	6	24.5	NONE			YES	7400	2.6	F	We left the controls in for 40 minutes after AT in order to match the longest AT it took for our experimental groups
B	ISOFLURANE		14:43:00	24.38	N/A	N/A	1792	15:13:00	22.54	2	30	6	24.5	NONE			YES	7400	1.6	M
C	ISOFLURANE		14:43:00	24.38	N/A	N/A	1792	15:13:00	22.54	2	30	6	24.5	NONE			YES	7400	1.4	M
D	ISOFLURANE		14:43:00	24.38	N/A	N/A	1792	15:13:00	22.54	2	30	6	24.5	NONE			YES	7400	2.5	F
E	ISOFLURANE		14:43:00	24.38	N/A	N/A	1792	15:13:00	22.54	2	30	6	24.5	NONE			YES	7400	3.4	F
F	ISOFLURANE		14:43:00	24.38	N/A	N/A	1792	15:13:00	22.54	2	30	6	24.5	NONE			YES	7400	1.5	M
G	ISOFLURANE		14:43:00	24.38	N/A	N/A	1792	15:13:00	22.54	2	30	6	24.5	NONE			YES	7400	1.6	M
H	ISOFLURANE		14:43:00	24.38	N/A	N/A	1792	15:13:00	22.54	2	30	6	24.5	NONE			YES	7400	2.8	F
I	ISOFLURANE		14:43:00	24.38	N/A	N/A	1792	15:13:00	22.54	2	30	6	24.5	NONE			NO	N/A	1.1	M
J	ISOFLURANE		14:43:00	24.38	N/A	N/A	1792	15:13:00	22.54	2	30	6	24.5	NONE			YES	7400	1.7	M
	OVERDOSE												Conc (ISO%) 1HR Check	Conc (mmHg) 1HR Check	Conc (ISO%) 17HR Check	Conc (mmHg) 17HR Check	Conc (ISO%) 24HR Check	Conc (mmHg) 24HR Check	Temperature post 24HR (C)	Response?	Recovery?	Weight (g)	Sex	Notes:
A	ISOFLURANE	24HOURS	15:29	24.11	10.74	0	1080	15:47:00	N/A	N/A	30	2	30	4	30	20	30	21	24.5	NONE	NO	1.3	M	2 2mL soaked cotton balls added for induction
B	ISOFLURANE	24HOURS	15:29	24.11	10.74	0	1080	15:47:00	N/A	N/A	30	2	30	4	30	20	30	21	24.5	NONE	NO	1.8	M
C	ISOFLURANE	24HOURS	15:29	24.11	10.74	0	1080	15:47:00	N/A	N/A	30	2	30	4	30	20	30	21	24.5	NONE	NO	1.4	M
D	ISOFLURANE	24HOURS	15:29	24.11	10.74	0	1080	15:47:00	N/A	N/A	30	2	30	4	30	20	30	21	24.5	NONE	NO	2.1	F
E	ISOFLURANE	24HOURS	15:29	24.11	10.74	0	1080	15:47:00	N/A	N/A	30	2	30	4	30	20	30	21	24.5	NONE	NO	2.6	F
F	ISOFLURANE	24HOURS	15:29	24.11	10.74	0	1080	15:47:00	N/A	N/A	30	2	30	4	30	20	30	21	24.5	NONE	NO	2.7	F
G	ISOFLURANE	24HOURS	15:29	24.11	10.74	0	1080	15:47:00	N/A	N/A	30	2	30	4	30	20	30	21	24.5	NONE	NO	1.3	M
H	ISOFLURANE	24HOURS	15:29	24.11	10.74	0	1080	15:47:00	N/A	N/A	30	2	30	4	30	20	30	21	24.5	NONE	NO	1.2	M
I	ISOFLURANE	24HOURS	15:29	24.11	10.74	0	1080	15:47:00	N/A	N/A	30	2	30	4	30	20	30	21	24.5	NONE	NO	1.3	M
J	ISOFLURANE	24HOURS	15:29	24.11	10.74	0	1080	15:47:00	N/A	N/A	30	2	30	4	30	20	30	21	24.5	NONE	NO	1.4	M
							1528
767																					M	F
767																					110	151
767
767
767
767
767
767
767
767
892
892
892
892
892
892
892
892
892
892
921
921
921
921
921
921
921
921
921
921
1050
1050
1050
1050
1050
1050
1050
1050
1050
1050
1060
1060
1060
1060
1060
1060
1060
1060
1060
1060
1080
1080
1080
1080
1080
1080
1080
1080
1080
1080
1209
1209
1209
1209
1209
1209
1209
1209
1209
1209
1215
1215
1215
1215
1215
1215
1215
1215
1215
1215
1276
1276
1276
1276
1276
1276
1276
1276
1276
1276
1425
1425
1425
1425
1425
1425
1425
1425
1425
1425
1450
1450
1450
1450
1450
1450
1450
1450
1450
1450
1455
1455
1455
1455
1455
1455
1455
1455
1455
1455
1470
1470
1470
1470
1470
1470
1470
1470
1470
1470
1586
1586
1586
1586
1586
1586
1586
1586
1586
1586
1620
1620
1620
1620
1620
1620
1620
1620
1620
1620
1645
1645
1645
1645
1645
1645
1645
1645
1645
1645
1675
1675
1675
1675
1675
1675
1675
1675
1675
1675
1710
1710
1710
1710
1710
1710
1710
1710
1710
1710
1760
1760
1760
1760
1760
1760
1760
1760
1760
1760
1760
1760
1760
1760
1760
1760
1760
1760
1760
1760
1792
1792
1792
1792
1792
1792
1792
1792
1792
1792
1960
1960
1960
1960
1960
1960
1960
1960
1960
1960
1985
1985
1985
1985
1985
1985
1985
1985
1985
1985
2123
2123
2123
2123
2123
2123
2123
2123
2123
2123
2130
2130
2130
2130
2130
2130
2130
2130
2130
2130
2140
2140
2140		2.15
2140		0.4
2140		5.35
2140		6.1
2140
2140
2140
2140
1528

## Sheet: Red Runner Cockroaches
Cockroach ID	Tx Group	Duration Group	Clock Time	Initial Box Temperature (C)	Initial Concentration 5 min (ISO%)	Initial Concentration 5 min (mmHg)	Anesthesia Time (sec)	Anesthesia Clock Time	Anesthesia Conc (ISO %)	Anesthesia Conc (CO2 mmHg)	Conc (ISO%) 30 min post AT	Conc (CO2 mmHg) 30 min post AT	Temp 30 min post AT (C)	Response?	Clock Time For TX	Temperature (C) of TX	Recovery?	Time to 1st Movement	Weight (g)	Sex
	FREEZING
A	-18C	1HR	9:25	24.27	6.61	0	1348	9:48	15.39	1	30	0	24.11	NONE	10:20:00	-14.61	NO	N/A	1.5	F
B	-18C	1HR	9:25	24.27	6.61	0	1348	9:48	15.39	1	30	0	24.11	NONE	10:20:00	-14.61	NO	N/A	0.7	F
C	-18C	1HR	9:25	24.27	6.61	0	1348	9:48	15.39	1	30	0	24.11	NONE	10:20:00	-14.61	NO	N/A	-0.5	F
D	-18C	1HR	9:25	24.27	6.61	0	1348	9:48	15.39	1	30	0	24.11	NONE	10:20:00	-14.61	NO	N/A	0.3	F
E	-18C	1HR	9:25	24.27	6.61	0	1348	9:48	15.39	1	30	0	24.11	NONE	10:20:00	-14.61	NO	N/A	0.3	F
F	-18C	1HR	9:25	24.27	6.61	0	1348	9:48	15.39	1	30	0	24.11	NONE	10:20:00	-14.61	NO	N/A	0.6	F
G	-18C	1HR	9:25	24.27	6.61	0	1348	9:48	15.39	1	30	0	24.11	NONE	10:20:00	-14.61	NO	N/A	0.2	M
H	-18C	1HR	9:25	24.27	6.61	0	1348	9:48	15.39	1	30	0	24.11	NONE	10:20:00	-14.61	NO	N/A	0.4	F
I	-18C	1HR	9:25	24.27	6.61	0	1348	9:48	15.39	1	30	0	24.11	NONE	10:20:00	-14.61	NO	N/A	0.3	F
J	-18C	1HR	9:25	24.27	6.61	0	1348	9:48	15.39	1	30	0	24.11	NONE	10:20:00	-14.61	NO	N/A	0.5	F
A	-80C	30MIN	09:26:00	24.22	6.3	1	948	09:42:00	12.48	1	30	2	24.11	NONE	10:17:00	-79	NO	N/A	0.2	M
B	-80C	30MIN	09:26:00	24.22	6.3	1	948	09:42:00	12.48	1	30	2	24.11	NONE	10:17:00	-79	NO	N/A	0.5	F
C	-80C	30MIN	09:26:00	24.22	6.3	1	948	09:42:00	12.48	1	30	2	24.11	NONE	10:17:00	-79	NO	N/A	0.2	M
D	-80C	30MIN	09:26:00	24.22	6.3	1	948	09:42:00	12.48	1	30	2	24.11	NONE	10:17:00	-79	NO	N/A	0.4	F
E	-80C	30MIN	09:26:00	24.22	6.3	1	948	09:42:00	12.48	1	30	2	24.11	NONE	10:17:00	-79	NO	N/A	0.4	F
F	-80C	30MIN	09:26:00	24.22	6.3	1	948	09:42:00	12.48	1	30	2	24.11	NONE	10:17:00	-79	NO	N/A	0.5	F
G	-80C	30MIN	09:26:00	24.22	6.3	1	948	09:42:00	12.48	1	30	2	24.11	NONE	10:17:00	-79	NO	N/A	0.3	F
H	-80C	30MIN	09:26:00	24.22	6.3	1	948	09:42:00	12.48	1	30	2	24.11	NONE	10:17:00	-79	NO	N/A	0.5	F
I	-80C	30MIN	09:26:00	24.22	6.3	1	948	09:42:00	12.48	1	30	2	24.11	NONE	10:17:00	-79	NO	N/A	0.5	F
J	-80C	30MIN	09:26:00	24.22	6.3	1	948	09:42:00	12.48	1	30	2	24.11	NONE	10:17:00	-79	NO	N/A	0.5	F
	IMMERSION																NOT MATCHED		NOT MATCHED	NOT MATCHED	Notes:
	ALCOHOL	15MIN	10:56:00	24.11	7.42	0	930	11:12:00	13.78	1	30	2	24.11	NONE	11:51:00		NO	N/A	0.5	F	None of the weights, sexes will match since we could not weigh them prior to immersion
	ALCOHOL	15MIN	10:56:00	24.11	7.42	0	930	11:12:00	13.78	1	30	2	24.11	NONE	11:51:00		NO	N/A	0.2	M
	ALCOHOL	15MIN	10:56:00	24.11	7.42	0	930	11:12:00	13.78	1	30	2	24.11	NONE	11:51:00		NO	N/A	0.4	F
	ALCOHOL	15MIN	10:56:00	24.11	7.42	0	930	11:12:00	13.78	1	30	2	24.11	NONE	11:51:00		NO	N/A	0.5	F
	ALCOHOL	15MIN	10:56:00	24.11	7.42	0	930	11:12:00	13.78	1	30	2	24.11	NONE	11:51:00		NO	N/A	0.4	F
	ALCOHOL	15MIN	10:56:00	24.11	7.42	0	930	11:12:00	13.78	1	30	2	24.11	NONE	11:51:00		NO	N/A	0.5	F
	ALCOHOL	15MIN	10:56:00	24.11	7.42	0	930	11:12:00	13.78	1	30	2	24.11	NONE	11:51:00		NO	N/A	0.2	M
	ALCOHOL	15MIN	10:56:00	24.11	7.42	0	930	11:12:00	13.78	1	30	2	24.11	NONE	11:51:00		NO	N/A	0.5	M
	ALCOHOL	15MIN	10:56:00	24.11	7.42	0	930	11:12:00	13.78	1	30	2	24.11	NONE	11:51:00		NO	N/A	0.4	F
	ALCOHOL	15MIN	10:56:00	24.11	7.42	0	930	11:12:00	13.78	1	30	2	24.11	NONE	11:51:00		NO	N/A	0.4	F
	INJECTABLE																				Notes:	Volumes Injected (mL)
A	KCl		15:15:00	24.22	7.09	0	980	15:31:00	12.79	1	22.14	2	24.38	NONE	16:09:00		NO	N/A	0.6	F		0.06
B	KCl		15:15:00	24.22	7.09	0	980	15:31:00	12.79	1	22.14	2	24.38	NONE	16:09:00		NO	N/A	0.2	M		0.02
C	KCl		15:15:00	24.22	7.09	0	980	15:31:00	12.79	1	22.14	2	24.38	NONE	16:09:00		NO	N/A	0.2	M		0.02
D	KCl		15:15:00	24.22	7.09	0	980	15:31:00	12.79	1	22.14	2	24.38	NONE	16:09:00		NO	N/A	0.4	F		0.04
E	KCl		15:15:00	24.22	7.09	0	980	15:31:00	12.79	1	22.14	2	24.38	NONE	16:09:00		NO	N/A	0.3	F		0.03
F	KCl		15:15:00	24.22	7.09	0	980	15:31:00	12.79	1	22.14	2	24.38	NONE	16:09:00		NO	N/A	0.3	M		0.02
G	KCl		15:15:00	24.22	7.09	0	980	15:31:00	12.79	1	22.14	2	24.38	NONE	16:09:00		NO	N/A	0.2	M		0.02
H	KCl		15:15:00	24.22	7.09	0	980	15:31:00	12.79	1	22.14	2	24.38	NONE	16:09:00		NO	N/A	0.2	M		0.02
I	KCl		15:15:00	24.22	7.09	0	980	15:31:00	12.79	1	22.14	2	24.38	NONE	16:09:00		NO	N/A	0.5	F		0.05
J	KCl		15:15:00	24.22	7.09	0	980	15:31:00	12.79	1	22.14	2	24.38	NONE	16:09:00		NO	N/A	0.6	F		0.06
A	PENTOBARBITAL		15:14:00	24.22	7	1	780	15:27:00	11.88	1	30	2	24.38	NONE	16:02:00		NO	N/A	0.5	F		0.01
B	PENTOBARBITAL		15:14:00	24.22	7	1	780	15:27:00	11.88	1	30	2	24.38	NONE	16:02:00		NO	N/A	0.5	F		0.01
C	PENTOBARBITAL		15:14:00	24.22	7	1	780	15:27:00	11.88	1	30	2	24.38	NONE	16:02:00		NO	N/A	0.6	F		0.01
D	PENTOBARBITAL		15:14:00	24.22	7	1	780	15:27:00	11.88	1	30	2	24.38	NONE	16:02:00		NO	N/A	0.4	F		0.01
E	PENTOBARBITAL		15:14:00	24.22	7	1	780	15:27:00	11.88	1	30	2	24.38	NONE	16:02:00		NO	N/A	0.7	F		0.01
F	PENTOBARBITAL		15:14:00	24.22	7	1	780	15:27:00	11.88	1	30	2	24.38	NONE	16:02:00		NO	N/A	0.3	M		0.01
G	PENTOBARBITAL		15:14:00	24.22	7	1	780	15:27:00	11.88	1	30	2	24.38	NONE	16:02:00		NO	N/A	0.2	M		0.01
H	PENTOBARBITAL		15:14:00	24.22	7	1	780	15:27:00	11.88	1	30	2	24.38	NONE	16:02:00		NO	N/A	0.3	M		0.01
I	PENTOBARBITAL		15:14:00	24.22	7	1	780	15:27:00	11.88	1	30	2	24.38	NONE	16:02:00		NO	N/A	0.3	M		0.01
J	PENTOBARBITAL		15:14:00	24.22	7	1	780	15:27:00	11.88	1	30	2	24.38	NONE	16:02:00		NO	N/A	0.2	M		0.01
	OVERDOSE												Conc (ISO%) 1HR Check	Conc (mmHg) 1HR Check	Conc (ISO%) 17HR Check	Conc (mmHg) 17HR Check	Conc (ISO%) 24HR Check	Conc (mmHg) 24HR Check	Temperature post 24HR (C)	Response?	Recovery?	Weight (g)	Sex	Notes:
A	ISOFLURANE	24HOURS	15:30:00	24.11	11.26	0	477	15:37:00	N/A	N/A	30	1	30	2	30	-14.44	30	7	24.5	NONE	NO	0.1	M	2 2mL soaked cotton balls added for induction
B	ISOFLURANE	24HOURS	15:30:00	24.11	11.26	0	477	15:37:00	N/A	N/A	30	1	30	2	30	-14.44	30	7	24.5	NONE	NO	0.5	F
C	ISOFLURANE	24HOURS	15:30:00	24.11	11.26	0	477	15:37:00	N/A	N/A	30	1	30	2	30	-14.44	30	7	24.5	NONE	NO	0.3	F
D	ISOFLURANE	24HOURS	15:30:00	24.11	11.26	0	477	15:37:00	N/A	N/A	30	1	30	2	30	-14.44	30	7	24.5	NONE	NO	0.5	F
E	ISOFLURANE	24HOURS	15:30:00	24.11	11.26	0	477	15:37:00	N/A	N/A	30	1	30	2	30	-14.44	30	7	24.5	NONE	NO	0.4	F
F	ISOFLURANE	24HOURS	15:30:00	24.11	11.26	0	477	15:37:00	N/A	N/A	30	1	30	2	30	-14.44	30	7	24.5	NONE	NO	0.7	F
G	ISOFLURANE	24HOURS	15:30:00	24.11	11.26	0	477	15:37:00	N/A	N/A	30	1	30	2	30	-14.44	30	7	24.5	NONE	NO	0.5	F
H	ISOFLURANE	24HOURS	15:30:00	24.11	11.26	0	477	15:37:00	N/A	N/A	30	1	30	2	30	-14.44	30	7	24.5	NONE	NO	0.6	F
I	ISOFLURANE	24HOURS	15:30:00	24.11	11.26	0	477	15:37:00	N/A	N/A	30	1	30	2	30	-14.44	30	7	24.5	NONE	NO	0.7	F
J	ISOFLURANE	24HOURS	15:30:00	24.11	11.26	0	477	15:37:00	N/A	N/A	30	1	30	2	30	-14.44	30	7	24.5	NONE	NO	0.2	M
	CONTROL										Conc (ISO%) 55 min Total Time	Conc (mmHg) 55 min Total Time	Temp 55 Total Time								Notes:
A	ISOFLURANE		09:23:00	24.27	6.4	1	980	09:40:00	30	1	30	2	24.22	NONE			NO	N/A	0.3	M	We left the controls in for 55 minutes total in order to match the longest AT it took for our experimental groups
B	ISOFLURANE		09:23:00	24.27	6.4	1	980	09:40:00	30	1	30	2	24.22	NONE			NO	N/A	0.2	M
C	ISOFLURANE		09:23:00	24.27	6.4	1	980	09:40:00	30	1	30	2	24.22	NONE			YES	<7HOURS	0.6	F
D	ISOFLURANE		09:23:00	24.27	6.4	1	980	09:40:00	30	1	30	2	24.22	NONE			YES	<7HOURS	0.4	F
E	ISOFLURANE		09:23:00	24.27	6.4	1	980	09:40:00	30	1	30	2	24.22	NONE			NO	N/A	0.5	F
F	ISOFLURANE		09:23:00	24.27	6.4	1	980	09:40:00	30	1	30	2	24.22	NONE			YES	24HOURS	0.3	F
G	ISOFLURANE		09:23:00	24.27	6.4	1	980	09:40:00	30	1	30	2	24.22	NONE			YES	24HOURS	0.2	F
H	ISOFLURANE		09:23:00	24.27	6.4	1	980	09:40:00	30	1	30	2	24.22	NONE			YES	<7HOURS	0.5	F
I	ISOFLURANE		09:23:00	24.27	6.4	1	980	09:40:00	30	1	30	2	24.22	NONE			YES	<7HOURS	0.4	F
J	ISOFLURANE		09:23:00	24.27	6.4	1	980	09:40:00	30	1	30	2	24.22	NONE			YES	<7HOURS	0.6	F
							948
477																			M	F
477																			20	50
477
477
477
477
477
477
477
477
780
780
780
780
780
780
780
780
780
780
930
930
930
930
930
930
930
930
930
930
948
948
948
948
948
948
948
948
948
948
980
980
980
980
980
980
980
980
980
980
980
980
980
980
980
980
980
980
980
980
1348
1348
1348
1348
1348
1348
1348
1348
1348
1348
948

## Sheet: Giant Cave Cockroaches
Cockroach ID	Tx Group	Duration Group	Clock Time	Initial Box Temperature (C)	Initial Concentration 5 min (ISO%)	Initial Concentration 5 min (mmHg)	Anesthesia Time (sec)	Anesthesia Clock Time	Anesthesia Conc (ISO %)	Anesthesia Conc (CO2 mmHg)	Conc (ISO%) 30 min post AT	Conc (CO2 mmHg) 30 min post AT	Temp 30 min post AT (C)	Response?	Clock Time For TX	Temperature (C) of TX	Recovery?	Time to 1st Movement	Weight (g)	Sex
	FREEZING
A	-18C	1HR	9:17	24.27	5.74	2	3091	10:08:00	18.48	6	20.95	8	24	NONE	10:43:00	-13.5	NO	N/A	6.8	F
B	-18C	1HR	9:17	24.27	5.74	2	3091	10:08:00	18.48	6	20.95	8	24	NONE	10:43:00	-13.5	NO	N/A	7.4	F
C	-18C	1HR	9:17	24.27	5.74	2	3091	10:08:00	18.48	6	20.95	8	24	NONE	10:43:00	-13.5	NO	N/A	6.7	F
D	-18C	1HR	9:17	24.27	5.74	2	3091	10:08:00	18.48	6	20.95	8	24	NONE	10:43:00	-13.5	NO	N/A	6.4	F
E	-18C	1HR	9:17	24.27	5.74	2	3091	10:08:00	18.48	6	20.95	8	24	NONE	10:43:00	-13.5	NO	N/A	4.5	M
F	-18C	1HR	9:17	24.27	5.74	2	3091	10:08:00	18.48	6	20.95	8	24	NONE	10:43:00	-13.5	NO	N/A	3.7	M
G	-18C	1HR	9:17	24.27	5.74	2	3091	10:08:00	18.48	6	20.95	8	24	NONE	10:43:00	-13.5	YES	<2HOURS	4.1	M
H	-18C	1HR	9:17	24.27	5.74	2	3091	10:08:00	18.48	6	20.95	8	24	NONE	10:43:00	-13.5	NO	N/A	4.7	M
I	-18C	1HR	9:17	24.27	5.74	2	3091	10:08:00	18.48	6	20.95	8	24	NONE	10:43:00	-13.5	NO	N/A	6.2	F
J	-18C	1HR	9:17	24.27	5.74	2	3091	10:08:00	18.48	6	20.95	8	24	NONE	10:43:00	-13.5	NO	N/A	5.4	F
A	-80C	30MIN	09:18:00	24.27	5.28	3	2715	10:03:00	30	8	30	8	24.27	NONE	10:38:00	-80	NO	N/A	4	M
B	-80C	30MIN	09:18:00	24.27	5.28	3	2715	10:03:00	30	8	30	8	24.27	NONE	10:38:00	-80	NO	N/A	4.2	F
C	-80C	30MIN	09:18:00	24.27	5.28	3	2715	10:03:00	30	8	30	8	24.27	NONE	10:38:00	-80	NO	N/A	5.3	F
D	-80C	30MIN	09:18:00	24.27	5.28	3	2715	10:03:00	30	8	30	8	24.27	NONE	10:38:00	-80	NO	N/A	5.7	F
E	-80C	30MIN	09:18:00	24.27	5.28	3	2715	10:03:00	30	8	30	8	24.27	NONE	10:38:00	-80	NO	N/A	4.1	M
F	-80C	30MIN	09:18:00	24.27	5.28	3	2715	10:03:00	30	8	30	8	24.27	YES					6.3	F
G	-80C	30MIN	09:18:00	24.27	5.28	3	2715	10:03:00	30	8	30	8	24.27	NONE	10:38:00	-80	NO	N/A	5.4	F
H	-80C	30MIN	09:18:00	24.27	5.28	3	2715	10:03:00	30	8	30	8	24.27	NONE	10:38:00	-80	NO	N/A	6	F
I	-80C	30MIN	09:18:00	24.27	5.28	3	2715	10:03:00	30	8	30	8	24.27	NONE	10:38:00	-80	NO	N/A	7	F
J	-80C	30MIN	09:18:00	24.27	5.28	3	2715	10:03:00	30	8	30	8	24.27	NONE	10:38:00	-80	NO	N/A	6.9	F
	IMMERSION																NOT MATCHED		NOT MATCHED	NOT MATCHED	Notes:
	ALCOHOL	15MIN	10:54:00	24.11	4.77	2	4845	12:15:00	19.76	8	30	6	24.27	NONE	12:47:00		NO	N/A	6.4	F	None of the weights, sexes will match since we could not weigh them prior to immersion
	ALCOHOL	15MIN	10:54:00	24.11	4.77	2	4845	13:15:00	19.76	8	30	6	24.27	NONE	12:47:00		NO	N/A	5.8	F	At 1 hour, another cotton ball soaked in iso was added in the induction stage
	ALCOHOL	15MIN	10:54:00	24.11	4.77	2	4845	14:15:00	19.76	8	30	6	24.27	NONE	12:47:00		NO	N/A	6.4	F
	ALCOHOL	15MIN	10:54:00	24.11	4.77	2	4845	15:15:00	19.76	8	30	6	24.27	NONE	12:47:00		NO	N/A	6.7	F
	ALCOHOL	15MIN	10:54:00	24.11	4.77	2	4845	16:15:00	19.76	8	30	6	24.27	NONE	12:47:00		NO	N/A	3.9	M
	ALCOHOL	15MIN	10:54:00	24.11	4.77	2	4845	17:15:00	19.76	8	30	6	24.27	NONE	12:47:00		NO	N/A	4.4	M
	ALCOHOL	15MIN	10:54:00	24.11	4.77	2	4845	18:15:00	19.76	8	30	6	24.27	NONE	12:47:00		NO	N/A	4.6	M
	ALCOHOL	15MIN	10:54:00	24.11	4.77	2	4845	19:15:00	19.76	8	30	6	24.27	NONE	12:47:00		NO	N/A	4.5	M
	ALCOHOL	15MIN	10:54:00	24.11	4.77	2	4845	20:15:00	19.76	8	30	6	24.27	NONE	12:47:00		NO	N/A	6.3	F
	ALCOHOL	15MIN	10:54:00	24.11	4.77	2	4845	21:15:00	19.76	8	30	6	24.27	NONE	12:47:00		NO	N/A	4.2	M
	INJECTABLE																				Notes:	Volumes Injected (mL)
A	KCl		15:03:00	24.27	5.06	2	4110	16:11:00	17.65	7	20.12	8	24.38	NONE	16:49:00		NO	N/A	7.4	F		0.74
B	KCl		15:03:00	24.27	5.06	2	4110	16:11:00	17.65	7	20.12	8	24.38	NONE	16:49:00		NO	N/A	5.6	F		0.56
C	KCl		15:03:00	24.27	5.06	2	4110	16:11:00	17.65	7	20.12	8	24.38	NONE	16:49:00		NO	N/A	6.1	F		0.61
D	KCl		15:03:00	24.27	5.06	2	4110	16:11:00	17.65	7	20.12	8	24.38	NONE	16:49:00		NO	N/A	6.4	F		0.64
E	KCl		15:03:00	24.27	5.06	2	4110	16:11:00	17.65	7	20.12	8	24.38	NONE	16:49:00		NO	N/A	7.4	F		0.74
F	KCl		15:03:00	24.27	5.06	2	4110	16:11:00	17.65	7	20.12	8	24.38	NONE	16:49:00		NO	N/A	6.3	F		0.63
G	KCl		15:03:00	24.27	5.06	2	4110	16:11:00	17.65	7	20.12	8	24.38	NONE	16:49:00		NO	N/A	6.4	F		0.64
H	KCl		15:03:00	24.27	5.06	2	4110	16:11:00	17.65	7	20.12	8	24.38	YES	N/A
I	KCl		15:03:00	24.27	5.06	2	4110	16:11:00	17.65	7	20.12	8	24.38	YES	N/A
J	KCl		15:03:00	24.27	5.06	2	4110	16:11:00	17.65	7	20.12	8	24.38	YES	N/A
A	PENTOBARBITAL		15:04:00	24.27	5.3	3	4080	16:13:00	18.81	7	17.27	9	24.22	NONE	16:53:00		NO	N/A	7.1	F		0.07
B	PENTOBARBITAL		15:04:00	24.27	5.3	3	4080	16:13:00	18.81	7	17.27	9	24.22	NONE	16:53:00		NO	N/A	6.2	F		0.06
C	PENTOBARBITAL		15:04:00	24.27	5.3	3	4080	16:13:00	18.81	7	17.27	9	24.22	NONE	16:53:00		NO	N/A	6.8	F		0.07
D	PENTOBARBITAL		15:04:00	24.27	5.3	3	4080	16:13:00	18.81	7	17.27	9	24.22	NONE	16:53:00		NO	N/A	6.5	F		0.07
E	PENTOBARBITAL		15:04:00	24.27	5.3	3	4080	16:13:00	18.81	7	17.27	9	24.22	NONE	16:53:00		NO	N/A	7	F		0.07
F	PENTOBARBITAL		15:04:00	24.27	5.3	3	4080	16:13:00	18.81	7	17.27	9	24.22	NONE	16:53:00		NO	N/A	6.8	F		0.07
G	PENTOBARBITAL		15:04:00	24.27	5.3	3	4080	16:13:00	18.81	7	17.27	9	24.22	NONE	16:53:00		NO	N/A	5.2	M		0.05
H	PENTOBARBITAL		15:04:00	24.27	5.3	3	4080	16:13:00	18.81	7	17.27	9	24.22	NONE	16:53:00		NO	N/A	6.6	F		0.07
I	PENTOBARBITAL		15:04:00	24.27	5.3	3	4080	16:13:00	18.81	7	17.27	9	24.22	YES	N/A
J	PENTOBARBITAL		15:04:00	24.27	5.3	3	4080	16:13:00	18.81	7	17.27	9	24.22	YES	N/A
	CONTROL										Conc (ISO%) 110 min Total Time	Conc (mmHg) 110 min Total Time	Temp 75 min Total Time								Notes:
A	ISOFLURANE		09:17:00	24.38	4.89	2	3920	10:22:00	15.32	4	30	0	24.11	NONE			YES	24HOURS	4.4	M	We left the controls in for 110 minutes total in order to match the longest AT it took for our experimental groups
B	ISOFLURANE		09:17:00	24.38	4.89	2	3920	10:22:00	15.32	4	30	0	24.11	NONE			YES	<2HOURS	6.7	F	Another 2mL soaked cotton ball was added during induction
C	ISOFLURANE		09:17:00	24.38	4.89	2	3920	10:22:00	15.32	4	30	0	24.11	NONE			YES	<2HOURS	5.8	F
D	ISOFLURANE		09:17:00	24.38	4.89	2	3920	10:22:00	15.32	4	30	0	24.11	NONE			YES	<3HOURS	6.4	F
E	ISOFLURANE		09:17:00	24.38	4.89	2	3920	10:22:00	15.32	4	30	0	24.11	NONE			YES	<2HOURS	4.6	M
F	ISOFLURANE		09:17:00	24.38	4.89	2	3920	10:22:00	15.32	4	30	0	24.11	NONE			YES	<2HOURS	5.7	F
G	ISOFLURANE		09:17:00	24.38	4.89	2	3920	10:22:00	15.32	4	30	0	24.11	NONE			YES	<3HOURS	6.7	F
H	ISOFLURANE		09:17:00	24.38	4.89	2	3920	10:22:00	15.32	4	30	0	24.11	NONE			YES	<7HOURS	3.9	M
I	ISOFLURANE		09:17:00	24.38	4.89	2	3920	10:22:00	15.32	4	30	0	24.11	NONE			YES	<3HOURS	5.7	F
J	ISOFLURANE		09:17:00	24.38	4.89	2	3920	10:22:00	15.32	4	30	0	24.11	NONE			YES	<3HOURS	4.5	M
							4000
2715																			M	F
2715																			16	39
2715
2715
2715
2715
2715
2715
2715
2715
3091
3091
3091
3091
3091
3091
3091
3091
3091
3091
3920
3920
3920
3920
3920
3920
3920
3920
3920
3920
4080
4080
4080
4080
4080
4080
4080
4080
4080
4080
4110
4110
4110
4110
4110
4110
4110
4110
4110
4110
4845
4845
4845
4845
4845
4845
4845
4845
4845
4845
4000

## Sheet: Madagascar Hissing Cockroaches
Cockroach ID	Tx Group	Duration Group	Clock Time	Initial Box Temperature (C)	Initial Concentration 5 min (ISO%)	Initial Concentration 5 min (mmHg)	Anesthesia Time (sec)	Anesthesia Clock Time	Anesthesia Conc (ISO %)	Anesthesia Conc (CO2 mmHg)	Conc (ISO%) 30 min post AT	Conc (CO2 mmHg) 30 min post AT	Temp 30 min post AT (C)	Response?	Clock Time For TX	Temperature (C) of TX	Recovery?	Time to 1st Movement	Weight (g)	Sex
	FREEZING
A	-18C	1HR	09:10:00	24.22	5.53	0	1659	09:37:00	15.99	3	17.83	5	24	NONE	10:10		YES	<7HOURS	9.6	F
B	-18C	1HR	09:10:00	24.22	5.53	0	1659	09:37:00	15.99	3	17.83	5	24	NONE	10:10		YES	<7HOURS	3.4	F
C	-18C	1HR	09:10:00	24.22	5.53	0	1659	09:37:00	15.99	3	17.83	5	24	NONE	10:10		YES	<7HOURS	5.1	M
D	-18C	1HR	09:10:00	24.22	5.53	0	1659	09:37:00	15.99	3	17.83	5	24	NONE	10:10		YES	<7HOURS	6.8	F
E	-18C	1HR	09:10:00	24.22	5.53	0	1659	09:37:00	15.99	3	17.83	5	24	NONE	10:10		YES	<7HOURS	4.9	F
F	-18C	1HR	09:10:00	24.22	5.53	0	1659	09:37:00	15.99	3	17.83	5	24	NONE	10:10		YES	<7HOURS	4.4	M
G	-18C	1HR	09:10:00	24.22	5.53	0	1659	09:37:00	15.99	3	17.83	5	24	NONE	10:10		NO	N/A	7.2	F
H	-18C	1HR	09:10:00	24.22	5.53	0	1659	09:37:00	15.99	3	17.83	5	24	NONE	10:10		YES	<7HOURS	6.3	M
I	-18C	1HR	09:10:00	24.22	5.53	0	1659	09:37:00	15.99	3	17.83	5	24	NONE	10:10		NO	N/A	1.8	M
J	-18C	1HR	09:10:00	24.22	5.53	0	1659	09:37:00	15.99	3	17.83	5	24	NONE	10:10		YES	<7HOURS	2.2	F
A	-80C	30MIN	09:10:00	24.22	5.87	0	2595	09:53:00	22.72	4	19.39	6	24	NONE	10:27	-80	NO	N/A	8.6	F
B	-80C	30MIN	09:10:00	24.22	5.87	0	2595	09:53:00	22.72	4	19.39	6	N/A	NONE	10:27	-80	NO	N/A	5.2	M
C	-80C	30MIN	09:10:00	24.22	5.87	0	2595	09:53:00	22.72	4	19.39	6	N/A	NONE	10:27	-80	NO	N/A	7.9	F
D	-80C	30MIN	09:10:00	24.22	5.87	0	2595	09:53:00	22.72	4	19.39	6	N/A	NONE	10:27	-80	NO	N/A	9.2	M
E	-80C	30MIN	09:10:00	24.22	5.87	0	2595	09:53:00	22.72	4	19.39	6	N/A	NONE	10:27	-80	NO	N/A	5.4	M
F	-80C	30MIN	09:10:00	24.22	5.87	0	2595	09:53:00	22.72	4	19.39	6	N/A	NONE	10:27	-80	NO	N/A	9.3	F
G	-80C	30MIN	09:10:00	24.22	5.87	0	2595	09:53:00	22.72	4	19.39	6	N/A	NONE	10:27	-80	NO	N/A	4.3	F
H	-80C	30MIN	09:10:00	24.22	5.87	0	2595	09:53:00	22.72	4	19.39	6	N/A	NONE	10:27	-80	YES	<7HOURS	9	F
I	-80C	30MIN	09:10:00	24.22	5.87	0	2595	09:53:00	22.72	4	19.39	6	N/A	NONE	10:27	-80	NO	N/A	2.7	M
J	-80C	30MIN	09:10:00	24.22	5.87	0	2595	09:53:00	22.72	4	19.39	6	N/A	NONE	10:27	-80	NO	N/A	2.3	M
	IMMERSION																NOT MATCHED		NOT MATCHED	NOT MATCHED	Notes:
	ALCOHOL	15MIN	10:55:00	24.11	5.03	1	2780	11:42:00	22.78	4	30	8	24.5	NONE	12:13:00		NO	N/A	7.2	F	None of the weights, sexes will match since we could not weigh them prior to immersion
	ALCOHOL	15MIN	10:55:00	24.11	5.03	1	2780	11:42:00	22.78	4	30	8	24.5	NONE	12:13:00		NO	N/A	6.4	M
	ALCOHOL	15MIN	10:55:00	24.11	5.03	1	2780	11:42:00	22.78	4	30	8	24.5	NONE	12:13:00		NO	N/A	6.6	F
	ALCOHOL	15MIN	10:55:00	24.11	5.03	1	2780	11:42:00	22.78	4	30	8	24.5	NONE	12:13:00		NO	N/A	9.9	F
	ALCOHOL	15MIN	10:55:00	24.11	5.03	1	2780	11:42:00	22.78	4	30	8	24.5	NONE	12:13:00		NO	N/A	7.8	F
	ALCOHOL	15MIN	10:55:00	24.11	5.03	1	2780	11:42:00	22.78	4	30	8	24.5	NONE	12:13:00		NO	N/A	3.4	F
	ALCOHOL	15MIN	10:55:00	24.11	5.03	1	2780	11:42:00	22.78	4	30	8	24.5	NONE	12:13:00		NO	N/A	4.8	M
	ALCOHOL	15MIN	10:55:00	24.11	5.03	1	2780	11:42:00	22.78	4	30	8	24.5	NONE	12:13:00		NO	N/A	4.3	M
	ALCOHOL	15MIN	10:55:00	24.11	5.03	1	2780	11:42:00	22.78	4	30	8	24.5	NONE	12:13:00		NO	N/A	5.1	M
	ALCOHOL	15MIN	10:55:00	24.11	5.03	1	2780	11:42:00	22.78	4	30	8	24.5	NONE	12:13:00		NO	N/A	2.7	M
	INJECTABLE																				Notes:	Volumes Injected (mL)
A	KCl		15:07:00	24.27	4.95	1	2760	15:53:00	18.71	5	18.91	7	24.38	NONE	16:29:00		NO	N/A	6.6	M		0.66
B	KCl		15:07:00	24.27	4.95	1	2760	15:53:00	18.71	5	18.91	7	24.38	NONE	16:29:00		NO	N/A	2.6	M		0.26
C	KCl		15:07:00	24.27	4.95	1	2760	15:53:00	18.71	5	18.91	7	24.38	NONE	16:29:00		NO	N/A	6.7	M		0.67
D	KCl		15:07:00	24.27	4.95	1	2760	15:53:00	18.71	5	18.91	7	24.38	NONE	16:29:00		NO	N/A	1.9	F		0.19
E	KCl		15:07:00	24.27	4.95	1	2760	15:53:00	18.71	5	18.91	7	24.38	NONE	16:29:00		NO	N/A	3.3	M		0.33
F	KCl		15:07:00	24.27	4.95	1	2760	15:53:00	18.71	5	18.91	7	24.38	NONE	16:29:00		NO	N/A	5.9	F		0.59
G	KCl		15:07:00	24.27	4.95	1	2760	15:53:00	18.71	5	18.91	7	24.38	NONE	16:29:00		NO	N/A	10.9	M		1.09
H	KCl		15:07:00	24.27	4.95	1	2760	15:53:00	18.71	5	18.91	7	24.38	NONE	16:29:00		NO	N/A	8.3	M		0.83
I	KCl		15:07:00	24.27	4.95	1	2760	15:53:00	18.71	5	18.91	7	24.38	NONE	16:29:00		NO	N/A	8.7	F		0.87
J	KCl		15:07:00	24.27	4.95	1	2760	15:53:00	18.71	5	18.91	7	24.38	NONE	16:29:00		NO	N/A	5.3	M		0.53
A	PENTOBARBITAL		15:06:00	24.27	5.62	2	2980	15:55:00	19.01	5	18.99	8	24.27	NONE	16:38:00		NO	N/A	10.9	F		0.1
B	PENTOBARBITAL		15:06:00	24.27	5.62	2	2980	15:55:00	19.01	5	18.99	8	24.27	NONE	16:38:00		NO	N/A	7.6	M		0.08
C	PENTOBARBITAL		15:06:00	24.27	5.62	2	2980	15:55:00	19.01	5	18.99	8	24.27	NONE	16:38:00		NO	N/A	9.5	M		0.1
D	PENTOBARBITAL		15:06:00	24.27	5.62	2	2980	15:55:00	19.01	5	18.99	8	24.27	NONE	16:38:00		NO	N/A	7.3	F		0.07
E	PENTOBARBITAL		15:06:00	24.27	5.62	2	2980	15:55:00	19.01	5	18.99	8	24.27	NONE	16:38:00		NO	N/A	4.7	M		0.05
F	PENTOBARBITAL		15:06:00	24.27	5.62	2	2980	15:55:00	19.01	5	18.99	8	24.27	NONE	16:38:00		NO	N/A	2.7	F		0.03
G	PENTOBARBITAL		15:06:00	24.27	5.62	2	2980	15:55:00	19.01	5	18.99	8	24.27	NONE	16:38:00		NO	N/A	7.8	F		0.08
H	PENTOBARBITAL		15:06:00	24.27	5.62	2	2980	15:55:00	19.01	5	18.99	8	24.27	NONE	16:38:00		NO	N/A	3.7	F		0.04
I	PENTOBARBITAL		15:06:00	24.27	5.62	2	2980	15:55:00	19.01	5	18.99	8	24.27	NONE	16:38:00		NO	N/A	7	F		0.07
J	PENTOBARBITAL		15:06:00	24.27	5.62	2	2980	15:55:00	19.01	5	18.99	8	24.27	NONE	16:38:00		YES	<1HR	9.8	F		0.1
	CONTROL										Conc (ISO%) 75 min Total Time	Conc (mmHg) 75 min Total Time	Temp 75 min Total Time								Notes:
A	ISOFLURANE		09:20:00	24.27	5.68	1	2350	09:59:00	17.95	4	17.53	7	24.11	NONE			YES	<2HOURS	11.1	M	We left the controls in for 75 minutes total in order to match the longest AT it took for our experimental groups
B	ISOFLURANE		09:20:00	24.27	5.68	1	2350	09:59:00	17.95	4	17.53	7	24.11	NONE			YES	<2HOURS	5.7	F
C	ISOFLURANE		09:20:00	24.27	5.68	1	2350	09:59:00	17.95	4	17.53	7	24.11	NONE			YES	<2HOURS	3.7	F
D	ISOFLURANE		09:20:00	24.27	5.68	1	2350	09:59:00	17.95	4	17.53	7	24.11	NONE			YES	<2HOURS	5.6	F
E	ISOFLURANE		09:20:00	24.27	5.68	1	2350	09:59:00	17.95	4	17.53	7	24.11	NONE			YES	<2HOURS	3	F
F	ISOFLURANE		09:20:00	24.27	5.68	1	2350	09:59:00	17.95	4	17.53	7	24.11	NONE			YES	<2HOURS	5.1	F
G	ISOFLURANE		09:20:00	24.27	5.68	1	2350	09:59:00	17.95	4	17.53	7	24.11	NONE			YES	<2HOURS	2.8	M
H	ISOFLURANE		09:20:00	24.27	5.68	1	2350	09:59:00	17.95	4	17.53	7	24.11	NONE			YES	<2HOURS	7.4	F
I	ISOFLURANE		09:20:00	24.27	5.68	1	2350	09:59:00	17.95	4	17.53	7	24.11	NONE			YES	<2HOURS	2.8	M
J	ISOFLURANE		09:20:00	24.27	5.68	1	2350	09:59:00	17.95	4	17.53	7	24.11	NONE			YES	<2HOURS	4.4	F
	OVERDOSE												Conc (ISO%) 1HR Check	Conc (mmHg) 1HR Check	Conc (ISO%) 17HR Check	Conc (mmHg) 17HR Check	Conc (ISO%) 24HR Check	Conc (mmHg) 24HR Check	Temperature post 24HR (C)	Response?	Recovery?	Weight (g)	Sex	Notes:
A	ISOFLURANE	24HOURS	15:31:00	24.22	9.29	0	1610	15:58:00	N/A	N/A	30	2	30	4	16.14	42	11.22	51	24.5	NONE	NO	8	M	2 2mL soaked cotton balls added for induction
B	ISOFLURANE	24HOURS	15:31:00	24.22	9.29	0	1610	15:58:00	N/A	N/A	30	2	30	4	16.14	42	11.22	51	24.5	NONE	NO	4.8	F
C	ISOFLURANE	24HOURS	15:31:00	24.22	9.29	0	1610	15:58:00	N/A	N/A	30	2	30	4	16.14	42	11.22	51	24.5	NONE	NO	9.7	M
D	ISOFLURANE	24HOURS	15:31:00	24.22	9.29	0	1610	15:58:00	N/A	N/A	30	2	30	4	16.14	42	11.22	51	24.5	NONE	NO	8.6	F
E	ISOFLURANE	24HOURS	15:31:00	24.22	9.29	0	1610	15:58:00	N/A	N/A	30	2	30	4	16.14	42	11.22	51	24.5	NONE	NO	2.6	F
F	ISOFLURANE	24HOURS	15:31:00	24.22	9.29	0	1610	15:58:00	N/A	N/A	30	2	30	4	16.14	42	11.22	51	24.5	NONE	NO	4.9	M
G	ISOFLURANE	24HOURS	15:31:00	24.22	9.29	0	1610	15:58:00	N/A	N/A	30	2	30	4	16.14	42	11.22	51	24.5	NONE	NO	2.7	M
H	ISOFLURANE	24HOURS	15:31:00	24.22	9.29	0	1610	15:58:00	N/A	N/A	30	2	30	4	16.14	42	11.22	51	24.5	NONE	NO	3.4	M
I	ISOFLURANE	24HOURS	15:31:00	24.22	9.29	0	1610	15:58:00	N/A	N/A	30	2	30	4	16.14	42	11.22	51	24.5	NONE	NO	4.6	F
J	ISOFLURANE	24HOURS	15:31:00	24.22	9.29	0	1610	15:58:00	N/A	N/A	30	2	30	4	16.14	42	11.22	51	24.5	NONE	NO	4	F
							2595
1610																							M	F
1610																							32	38
1610
1610
1610
1610
1610
1610
1610
1610
1659
1659
1659
1659
1659
1659
1659
1659
1659
1659
2350
2350
2350
2350
2350
2350
2350
2350
2350
2350
2595
2595
2595
2595
2595
2595
2595
2595
2595
2595
2760
2760
2760
2760
2760
2760
2760
2760
2760
2760
2780
2780
2780
2780
2780
2780
2780
2780
2780
2780
2980
2980
2980
2980
2980
2980
2980
2980
2980
2980
2595
